# Supplementary material
Source: ML conference proceedings conference paper supplement (https://openaccess.thecvf.com/content/WACV2021/html/Loukkal_Driving_Among_Flatmobiles_WACV_2021_paper.html)
Supplement: Supplementary file 1 [file Loukkal_Driving_Among_Flatmobiles_WACV_2021_supplemental.zip]

Archive with 2 entries (2 files):
- 0229-supp/0229-supp.pdf
- 0229-supp/Closed-loop driving in carla simulator.mp4
